# Supplementary material for: Development and validation of prediction models for hypertension risks in rural Chinese populations
Source: PubMed Central journal article supplement (PMC6875679; doi:10.7189/jogh.09.020601), 2019-12
Supplement: jogh-09-020601-s001.pdf [file jogh-09-020601-s001.pdf]

## Online Supplementary Document

### **Title:**

Development and Validation of Prediction Models for Hypertension Risks in Rural Chinese Populations

### **Running Head**

Hypertension Risk Model for rural China

### **Authors**

Fei Xu <sup>1</sup>, Jicun Zhu <sup>1</sup>, Nan Sun <sup>2</sup>, Lu Wang <sup>1</sup>, Chen Xie <sup>1</sup>, Qixin Tang <sup>1</sup>, Xiangjie Mao <sup>1</sup>, Xianzhi Fu <sup>1</sup>, Anna Brickell <sup>3</sup>, Yibin Hao <sup>4</sup> and Changqing Sun <sup>1\*</sup>

### **Authors affiliations**

<sup>1</sup> Department of Social Medicine and Health Management, College of Public Health, Zhengzhou University, Zhengzhou, Henan, *PR* China.

<sup>2</sup> Department of Management Information Systems, Terry College of Business, University of Georgia, Athens, Georgia, United State.

<sup>3</sup> College of Medicine, University of Arkansas for Medical Sciences, Little Rock, Arkansas, United State.

<sup>4</sup> People's Hospital of Zhengzhou, Zhengzhou, Henan, *PR* China.

### **\* Corresponding author**

Prof. Chang-qing Sun

Department of Social Medicine and Health Management,

College of Public Health, Zhengzhou University,

100 Kexue Avenue, Zhengzhou, 450001, Henan, *PR* China.

E-mail: [zzugwsy@163.com](mailto:zzugwsy@163.com)

## **Online Supplementary Document**

**Supplementary Table S1** Baseline demographic characteristics and biochemical indexes of study participants.

**Supplementary Table S2** Baseline demographic characteristics and biochemical indexes of testing set.

**Supplementary Table S3** Univariate Cox proportional hazards regression analysis for men in training set.

**Supplementary Table S4** Univariate Cox proportional hazards regression analysis for women in training set.

**Supplementary Table S5** Cross-validation of Cox regression models (M1, W1 and W2 model) for internal consistency of hypertension incident risk in training set.

**Supplementary Table S6** Discriminative ability, sensitivity and specificity of the different 6-year hypertension incident risk models for men in training set.

**Supplementary Table S7** Discriminative ability, sensitivity and specificity of the different 6-year hypertension incident risk models for women in training set.

**Supplementary Table S8** Calibration of Kaplan-Meier observed and predicted 6-year hypertension incident for men in training set.

**Supplementary Table S9** Calibration of Kaplan-Meier observed and predicted 6-year hypertension incident for women in training set.

**Supplementary Table S10** Discriminative ability, sensitivity and specificity of the different 6-year hypertension incident risk models for men in testing set.

**Supplementary Table S11** Discriminative ability, sensitivity and specificity of the different 6-year hypertension incident risk models for women in testing set.

**Supplementary Table S12** Calibration of Kaplan-Meier observed and predicted 6-year hypertension incident for men in testing set.

**Supplementary Table S13** Calibration of Kaplan-Meier observed and predicted 6-year hypertension incident for women in testing set.

**Supplementary Figure S1** Sketch map of data collection site.

**Supplementary Figure S2** Nodes in hidden layer for men (A) and women (B) in ANN models according to 10×10 cross-validation.

**Supplementary Figure S3** Network chat of ANN models. There are three nodes in hidden layer for men (A) and nine nodes in hidden layer for women (B), and line

thickness and color gradation represent the weight of the predictors. FamHTN1 means hypertension parental history and HTN means hypertension.

**Supplementary Figure S4** Tree graph of CART models for men (A) and women (B).

**Supplementary Figure S5** Complexity parameter for men (A) and women (B) in CART models according to 10-fold cross-validation.

**Supplementary Figure S6** Kaplan-Meier observed and predicted hypertension incident for different hypertension models in training set men: M1 model (A), ANN model (B), CART model (C) and NBC model (D), by groups of predicted probabilities.

**Supplementary Figure S7** Kaplan-Meier observed and predicted hypertension incident for different hypertension models in training set women: W1 model (A), W2 model (B), ANN model (C), CART model (D) and NBC model (E), by groups of predicted probabilities.

**Supplementary Figure S8** Kaplan-Meier observed and predicted hypertension incident for different hypertension models in testing set men: M1 model (A), ANN model (B), CART model (C) and NBC model (D), by groups of predicted probabilities.

**Supplementary Figure S9** Kaplan-Meier observed and predicted hypertension incident for different hypertension models in testing set women: W1 model (A), W2 model (B), ANN model (C), CART model (D) and NBC model (E), by groups of predicted probabilities.

**Supplementary Table S1** Baseline demographic characteristics and biochemical indexes of study participants.

| Variables                            | Training set<br>(n = 4796) | Testing set<br>(n = 3523) | <i>P</i>              |
|--------------------------------------|----------------------------|---------------------------|-----------------------|
| Age, years                           | 50 (42-57)                 | 50 (43-58)                | 0.3819 <sup>§</sup>   |
| Gender, men (n, %)                   | 1853 (38.64)               | 1447 (41.07)              | 0.0263 <sup>  </sup>  |
| Educational level (n, %)             |                            |                           | 0.5687 <sup>  </sup>  |
| Illiteracy                           | 609 (12.70)                | 438 (12.43)               |                       |
| Primary school                       | 1583 (33.01)               | 1208 (34.29)              |                       |
| Junior high                          | 2113 (44.06)               | 1539 (43.68)              |                       |
| High school and above                | 491 (10.24)                | 338 (9.59)                |                       |
| Marital status (n, %)                |                            |                           | 0.0169 <sup>  </sup>  |
| Married/cohabitation                 | 4503 (93.97)               | 3354 (95.20)              |                       |
| Others                               | 289 (6.03)                 | 169 (4.80)                |                       |
| Income *, CNY † (n, %)               |                            |                           | <0.0001 <sup>  </sup> |
| < 1000                               | 4422 (92.34)               | 3373 (95.91)              |                       |
| 1000 ~                               | 273 (5.70)                 | 130 (3.70)                |                       |
| ≥ 3000                               | 94 (1.96)                  | 14 (0.40)                 |                       |
| hypertension Paternal history (n, %) | 1391 (29.00)               | 1034 (29.35)              | 0.7495 <sup>  </sup>  |
| High fat diet (n, %)                 | 187 (3.90)                 | 171 (4.85)                | 0.0389 <sup>  </sup>  |
| Fruit and vegetable intake (n, %)    | 1997 (41.64)               | 1381 (39.20)              | 0.0027 <sup>  </sup>  |
| General obesity (n, %)               | 559 (11.66)                | 343 (9.74)                | 0.0060 <sup>  </sup>  |
| Central obesity (n, %)               | 1984 (41.37)               | 1335 (37.90)              | 0.0015 <sup>  </sup>  |
| Current smoking (n, %)               | 1152 (24.02)               | 860 (24.41)               | 0.6998 <sup>  </sup>  |
| Drink (n, %)                         | 601 (12.53)                | 398 (11.30)               | 0.0936 <sup>  </sup>  |
| T2DM (n, %)                          | 332 (6.92)                 | 218 (6.19)                | 0.1979 <sup>  </sup>  |
| Heart rate, bpm ‡                    | 74 (67-84)                 | 74 (67-81)                | 0.0114 <sup>§</sup>   |
| SBP, mm Hg                           | 116 (108-125)              | 117 (109-125)             | 0.1470 <sup>§</sup>   |
| TC, mmol/L                           | 4.35 (3.83-4.98)           | 4.44 ± 0.95               | 0.5597 <sup>§</sup>   |
| TG, mmol/L                           | 1.30 (0.90-1.80)           | 1.40 (1.00-2.00)          | <0.0001 <sup>§</sup>  |
| HDL-c, mmol/L                        | 1.15 (0.99-1.33)           | 1.13 (0.99-1.31)          | 0.0588 <sup>§</sup>   |
| LDL-c, mmol/L                        | 2.50 (2.10-3.00)           | 2.50 (2.03-3.00)          | 0.0091 <sup>§</sup>   |
| FPG, mmol/L                          | 5.32 (4.97-5.74)           | 5.33 (5.00-5.73)          | 0.0194 <sup>§</sup>   |
| DBP, mm Hg                           | 74.00 (68.67-79.33)        | 74.33 (69.33-79.67)       | 0.0056 <sup>§</sup>   |
| Pulse pressure, mm Hg                | 42.00 (37.00-48.00)        | 42.00 (36.67-47.67)       | 0.9841 <sup>§</sup>   |
| BMI, kg/m <sup>2</sup>               | 23.83 (21.65-26.18)        | 23.43 (21.21-25.26)       | <0.0001 <sup>§</sup>  |
| WC, cm                               | 81.00 (74.40-88.00)        | 80.25 (73.75-87.00)       | 0.0010 <sup>§</sup>   |

Data is quantity (percentage) for categorical variables and median (interquartile range) for continuous variables.

\* Average monthly income, † CNY: Chinese Yuan, ‡ bpm: beats per minute. § Wilcoxon rank sum test. || Chi-square test.

Abbreviations: T2DM, type 2 diabetes mellitus; SBP, systolic blood pressure; TC, total cholesterol; TG, triglyceride; HDL-c, high-density lipoprotein cholesterol; LDL-c, low-density lipoprotein cholesterol; FPG, fasting plasma glucose; DBP, diastolic blood pressure; BMI, body mass index; WC, waist circumference.

**Supplementary Table S2** Baseline demographic characteristics and biochemical indexes of testing set.

| Variables                            | Men<br>(n = 1447)   | Women<br>(n = 2076) | P                     |
|--------------------------------------|---------------------|---------------------|-----------------------|
| Age, years                           | 52 (44-60)          | 48 (42-56)          | <0.0001 <sup>§</sup>  |
| Educational level (n, %)             |                     |                     | 0.5687 <sup>  </sup>  |
| Illiteracy                           | 57 (3.94)           | 381 (15.35)         |                       |
| Primary school                       | 424 (29.30)         | 784 (37.76)         |                       |
| Junior high                          | 767 (53.01)         | 772 (37.19)         |                       |
| High school and above                | 199 (13.75)         | 139 (6.70)          |                       |
| Marital status (n, %)                |                     |                     | 0.0169 <sup>  </sup>  |
| Married/cohabitation                 | 1372 (94.82)        | 1982 (95.47)        |                       |
| Others                               | 75 (5.18)           | 94 (4.53)           |                       |
| Income *, CNY † (n, %)               |                     |                     | <0.0001 <sup>  </sup> |
| < 1000                               | 1386 (95.78)        | 1987 (95.99)        |                       |
| 1000 ~                               | 57 (3.94)           | 73 (3.53)           |                       |
| ≥ 3000                               | 4 (0.28)            | 10 (0.48)           |                       |
| hypertension paternal history (n, %) | 117 (8.09)          | 54 (2.60)           | 0.7495 <sup>  </sup>  |
| High fat diet (n, %)                 | 149 (9.00)          | 72 (2.99)           | 0.0389 <sup>  </sup>  |
| Fruit and vegetable intake (n, %)    | 588 (40.64)         | 793 (38.20)         | 0.0027 <sup>  </sup>  |
| General obesity (n, %)               | 87 (6.01)           | 256 (12.33)         | 0.0060 <sup>  </sup>  |
| Central obesity (n, %)               | 304 (21.01)         | 1031 (49.66)        | 0.0015 <sup>  </sup>  |
| Current smoking (n, %)               | 855 (59.09)         | 5 (0.24)            | 0.6998 <sup>  </sup>  |
| Drink (n, %)                         | 383 (26.47)         | 15 (0.72)           | 0.0936 <sup>  </sup>  |
| T2DM (n, %)                          | 88 (6.08)           | 130 (6.26)          | 0.1979 <sup>  </sup>  |
| Heart rate, bpm ‡                    | 71 (65-78)          | 76 (70-83)          | <0.0001 <sup>§</sup>  |
| SBP, mm Hg                           | 117 (110-126)       | 116 (108-125)       | 0.0031 <sup>§</sup>   |
| TC, mmol/L                           | 4.29 (3.77-4.89)    | 4.39 (3.83-5.00)    | 0.0008 <sup>§</sup>   |
| TG, mmol/L                           | 1.40 (1.00-2.00)    | 1.40 (1.00-2.00)    | 0.9366 <sup>§</sup>   |
| HDL-c, mmol/L                        | 1.08 (0.95-1.24)    | 1.17 (1.02-1.45)    | <0.0001 <sup>§</sup>  |
| LDL-c mmol/L                         | 2.50 (2.00-3.00)    | 2.50 (2.10-3.00)    | 0.6503 <sup>§</sup>   |
| FPG, mmol/L                          | 5.29 (4.99-5.70)    | 5.35 (5.02-5.76)    | 0.0193 <sup>§</sup>   |
| DBP, mm Hg                           | 74.00 (69.00-79.67) | 74.67 (69.33-79.67) | 0.0754 <sup>§</sup>   |
| Pulse pressure, mm Hg                | 43.00 (38.33-48.33) | 41.33 (35.92-47.42) | <0.0001 <sup>§</sup>  |
| BMI, kg/m <sup>2</sup>               | 22.85 (20.80-24.95) | 23.98 (21.59-26.21) | <0.0001 <sup>§</sup>  |
| WC, cm                               | 81.20 (74.25-88.10) | 79.90 (73.35-86.50) | <0.0001 <sup>§</sup>  |

Data is quantity (percentage) for categorical variables and median (interquartile range) for continuous variables.

\* Average monthly income, † CNY: Chinese Yuan, ‡ bpm: beats per minute. § Wilcoxon rank sum test. || Chi-square test.

Abbreviations: T2DM, type 2 diabetes mellitus; SBP, systolic blood pressure; TC, total cholesterol; TG, triglyceride; HDL-c, high-density lipoprotein cholesterol; LDL-c, low-density lipoprotein cholesterol; FPG, fasting plasma glucose; DBP, diastolic blood pressure; BMI, body mass index; WC, waist circumference.

**Supplementary Table S3** Univariate Cox proportional hazards regression analysis for men in training set.

| Variables                                      | $\beta$ | HR (95% CI)             | P       |
|------------------------------------------------|---------|-------------------------|---------|
| Age, years                                     | 0.0304  | 1.0310 (1.0210, 1.0410) | <0.0001 |
| SBP, mmHg                                      | 0.0733  | 1.0760 (1.0650, 1.0870) | <0.0001 |
| DBP, mmHg                                      | 0.0791  | 1.0820 (1.0680, 1.0970) | <0.0001 |
| Pulse pressure, mmHg                           | 0.0580  | 1.060 (1.0470, 1.0730)  | <0.0001 |
| WC, cm                                         | 0.0201  | 1.020 (1.01100, 1.0300) | <0.0001 |
| BMI, kg/m <sup>2</sup>                         | 0.0714  | 1.0740 (1.0430, 1.1060) | <0.0001 |
| Heart rate, bpm                                | 0.0018  | 1.0020 (0.9924, 1.0110) | 0.7110  |
| T2DM (Yes vs No)                               | 0.3107  | 1.3640 (0.9467, 1.9660) | 0.0957  |
| Current smoking (Yes vs No)                    | -0.2084 | 0.8119 (0.6710, 0.9824) | 0.0321  |
| Drink (Yes vs No)                              | -0.0464 | 0.9546 (0.7768, 1.1730) | 0.6590  |
| Higher vegetables and fruit intake (Yes vs No) | 0.0260  | 1.0260 (0.9743, 1.2400) | 0.7870  |
| High fat diet (Yes vs No)                      | 0.2908  | 1.3375 (0.9729, 1.8390) | 0.0734  |
| hypertension paternal history (Yes vs No)      | 0.2686  | 1.3081 (1.0700, 1.5990) | 0.0088  |
| General obesity (Yes vs No)                    | 0.1843  | 1.2024 (0.8746, 1.6530) | 0.2560  |
| Central obesity (Yes vs No)                    | 0.4529  | 1.5728 (1.2800, 1.9330) | <0.0001 |
| Weight categories                              |         |                         |         |
| Low weight                                     | -0.3135 | 0.7309 (0.3607, 1.4810) | 0.3843  |
| Normal weight                                  |         | 1.00                    |         |
| Over weight                                    | 0.4039  | 1.4976 (1.2246, 1.8310) | <0.0001 |
| Obesity                                        | 0.3379  | 1.4020 (1.1006, 1.9540) | 0.0459  |
| Income *, CNY † (n, %)                         |         |                         |         |
| < 1000                                         |         | 1.00                    |         |
| 1000 ~                                         | -0.0082 | 0.9918 (0.6841, 1.4380) | 0.9650  |
| ≥ 3000                                         | 0.0027  | 1.0027 (0.5352, 1.8780) | 0.9930  |
| Educational level (n, %)                       |         |                         |         |
| Illiteracy                                     |         | 1.00                    |         |
| Primary school                                 | -0.1474 | 0.8630 (0.5751, 1.2949) | 0.4766  |
| Junior high                                    | -0.4610 | 0.6307 (0.4244, 0.9371) | 0.0225  |
| High school and above                          | -0.3465 | 0.7072 (0.4554, 1.0982) | 0.1229  |
| FPG, mmol/L                                    | 0.0620  | 1.0640 (0.9971, 1.1350) | 0.0613  |
| TC, mmol/L                                     | 0.1001  | 1.1050 (1.0001, 1.2210) | 0.0489  |
| TG, mmol/L                                     | 0.0504  | 1.0520 (0.9703, 1.1400) | 0.2200  |
| HDL-c, mmol/L                                  | 0.1054  | 1.0540 (0.7486, 1.4840) | 0.7630  |
| LDL-c, mmol/L                                  | 0.0898  | 1.0940 (0.9714, 1.2320) | 0.1390  |

\* Average monthly income, † CNY: Chinese Yuan.

Results suggested that age, SBP, DBP, pulse pressure, WC, BMI, current smoking status, hypertension parental history, educational level and TC were related factors of hypertension ( $P < 0.05$ ) in men. And the FPG was potentially related with hypertension in men ( $P$  value approximately 0.05).

**Supplementary Table S4** Univariate Cox proportional hazards regression analysis for women in training set.

| Variables                                      | $\beta$ | HR (95%CI)              | P       |
|------------------------------------------------|---------|-------------------------|---------|
| Age, years                                     | 0.0388  | 1.0400 (1.0310, 1.0480) | <0.0001 |
| SBP, mmHg                                      | 0.0847  | 1.0880 (1.0800, 1.0970) | <0.0001 |
| DBP, mmHg                                      | 0.1077  | 1.1140 (1.1000, 1.1270) | <0.0001 |
| Pulse pressure, mmHg                           | 0.0642  | 1.0660 (1.0570, 1.0760) | <0.0001 |
| WC, cm                                         | 0.0295  | 1.0300 (1.0220, 1.0390) | <0.0001 |
| BMI, kg/m <sup>2</sup>                         | 0.0760  | 1.0790 (1.0540, 1.1040) | <0.0001 |
| Heart rate, bpm *                              | 0.0089  | 1.0090 (1.0010, 1.0170) | 0.0286  |
| T2DM (Yes vs No)                               | 0.3966  | 1.4870 (1.1530, 1.9170) | 0.0022  |
| Drink (Yes vs No)                              | 0.2189  | 1.2450 (0.4656, 3.3280) | 0.6630  |
| Higher vegetables and fruit intake (Yes vs No) | -0.1731 | 0.8411 (0.7109, 0.9950) | 0.0435  |
| High fat diet (Yes vs No)                      | -0.1200 | 0.8869 (0.4415, 1.7820) | 0.7360  |
| hypertension paternal history (Yes vs No)      | 0.1662  | 1.1810 (0.9969, 1.3390) | 0.0543  |
| General obesity (Yes vs No)                    | 0.4136  | 1.5120 (1.2300, 1.8590) | <0.0001 |
| Central obesity (Yes vs No)                    | 0.4192  | 1.5210 (1.2910, 1.7920) | <0.0001 |
| Weight categories                              |         |                         |         |
| Low weight                                     | -0.0419 | 0.9589 (0.5088, 1.8070) | 0.8970  |
| Normal weight                                  |         | Referent                |         |
| Over weight                                    | 0.4079  | 1.5037 (1.2573, 1.7980) | <0.0001 |
| Obesity                                        | 0.6099  | 1.8402 (1.4636, 2.3140) | <0.0001 |
| Income †, CNY ‡ (n, %)                         |         |                         |         |
| < 1000                                         |         | Referent                |         |
| 1000 ~                                         | -0.3011 | 0.7400 (0.4834, 1.1330) | 0.1660  |
| ≥ 3000                                         | 0.0165  | 1.0170 (0.5440, 1.9000) | 0.9590  |
| Educational level (n, %)                       |         |                         |         |
| Illiteracy                                     |         | Referent                |         |
| Primary school                                 | -0.4501 | 0.6376 (0.5195, 0.7825) | <0.0001 |
| Junior high                                    | -0.6825 | 0.5053 (0.4094, 0.6238) | <0.0001 |
| High school and above                          | -0.5571 | 0.5729 (0.3989, 0.8228) | 0.0026  |
| FPG, mmol/L                                    | 0.0591  | 1.0610 (1.0160, 1.1080) | 0.0075  |
| TC, mmol/L                                     | 0.1349  | 1.1440 (1.0570, 1.2390) | 0.0009  |
| TG, mmol/L                                     | 0.1199  | 1.1274 (1.0570, 1.2020) | 0.0002  |
| HDL-c, mmol/L                                  | -0.2421 | 0.7850 (0.6085, 1.0130) | 0.0625  |
| LDL-c, mmol/L                                  | 0.1222  | 1.1300 (1.0250, 1.2460) | 0.0141  |

\* bpm: beats per minute; † Average monthly income; ‡ CNY: Chinese Yuan.

Due to the fact that there are only nine current smokers in women (0.31 percent), the results of univariate analysis may lead to great random fluctuation, so current smoking is not considered in the women's univariate analysis.

In women, age, SBP, DBP, pulse pressure, WC, BMI, heart rates, fruit and vegetable intake, educational level, FPG, triglyceride (TG), low-density lipoprotein cholesterol (LDL-c) and TC were significantly related with hypertension ( $P < 0.05$ ) based on the univariate Cox regression analysis. And the hypertension parental history and HDL-c were potentially related with hypertension in women ( $P$  value approximately 0.05).

**Supplementary Table S5** Cross-validation of Cox regression models (M1, W1 and W2 model) for internal consistency of hypertension incident risk in training set.

| <b>Index</b>          | <b>Index original</b> | <b>Training</b> | <b>Test</b> | <b>Optimism</b> | <b>Index corrected</b> |
|-----------------------|-----------------------|-----------------|-------------|-----------------|------------------------|
| <b>M1 model</b>       |                       |                 |             |                 |                        |
| <b>Dxy*</b>           | 0.4773                | 0.4777          | 0.4711      | 0.0065          | 0.4707                 |
| <b>R<sup>2†</sup></b> | 0.1466                | 0.1473          | 0.1534      | -0.0061         | 0.1527                 |
| <b>Slope</b>          | 1                     | 1               | 0.9766      | 0.0234          | 0.9766                 |
| <b>D</b>              | 0.0453                | 0.0461          | 0.0631      | -0.017          | 0.0623                 |
| <b>U</b>              | -0.0003               | -0.0004         | 0.0025      | -0.0029         | 0.0026                 |
| <b>Q</b>              | 0.0456                | 0.0465          | 0.0606      | -0.0141         | 0.0598                 |
| <b>g</b>              | 1.0541                | 1.0557          | 1.0295      | 0.0262          | 1.0279                 |
| <b>W1 model</b>       |                       |                 |             |                 |                        |
| <b>Dxy*</b>           | 0.5622                | 0.5623          | 0.5587      | 0.0036          | 0.5586                 |
| <b>R<sup>2†</sup></b> | 0.1912                | 0.1918          | 0.2043      | -0.0125         | 0.2037                 |
| <b>Slope</b>          | 1                     | 1               | 1.0016      | -0.0016         | 1.0016                 |
| <b>D</b>              | 0.0645                | 0.0655          | 0.0906      | -0.0251         | 0.0896                 |
| <b>U</b>              | -0.0002               | -0.0002         | 0.0013      | -0.0015         | 0.0013                 |
| <b>Q</b>              | 0.0647                | 0.0657          | 0.0893      | -0.0235         | 0.0883                 |
| <b>g</b>              | 1.3769                | 1.3778          | 1.3772      | 0.0006          | 1.3763                 |
| <b>W2 model</b>       |                       |                 |             |                 |                        |
| <b>Dxy*</b>           | 0.5612                | 0.5614          | 0.5564      | 0.005           | 0.5561                 |
| <b>R<sup>2†</sup></b> | 0.1926                | 0.1933          | 0.2058      | -0.0125         | 0.2051                 |
| <b>Slope</b>          | 1                     | 1               | 1.0088      | -0.0088         | 1.0088                 |
| <b>D</b>              | 0.0651                | 0.0661          | 0.0925      | -0.0264         | 0.0914                 |
| <b>U</b>              | -0.0002               | -0.0002         | 0.003       | -0.0032         | 0.003                  |
| <b>Q</b>              | 0.0653                | 0.0663          | 0.0895      | -0.0232         | 0.0885                 |
| <b>g</b>              | 1.3831                | 1.3848          | 1.3906      | -0.0059         | 1.3889                 |

\***Dxy** means Somers'  $D_{xy}$ . When  $Y$  is binary,  $D_{xy} = 2 \times (c - 0.5)$  where  $c$  is the concordance probability or area under the receiver operating characteristic curve, a linear translation of the Wilcoxon-Mann-Whitney statistic.

†**R<sup>2</sup>** is mostly a measure of discrimination, and  $R^2_{adj}$  is a good overfitting-corrected measure, if the model is pre-specified. Estimating the relationship between the predicted probability and the observed outcome in calibration also leads to indexes of unreliability (U), discrimination (D), and overall quality ( $Q = D - U$ ) which are derived from likelihood ratio tests. Q is a logarithmic scoring rule, which can be compared with Brier's index. The g-index is a new measure of a model's predictive discrimination, an interpretable, robust, and highly efficient measure of variation.



**Supplementary Table S6** Discriminative ability, sensitivity and specificity of the different 6-year hypertension incident risk models for men in training set.

| Models   | AUC(95% CI)          | Cut-off | Sensitivity(%) | Specificity(%) | Youden index |
|----------|----------------------|---------|----------------|----------------|--------------|
| M1 *†    | 0.765 (0.745, 0.784) | 0.1926  | 77.3           | 64.6           | 0.419        |
| ANN *†   | 0.767 (0.747, 0.786) | 0.2305  | 76.6           | 64.3           | 0.409        |
| NBC †‡§  | 0.751 (0.730, 0.770) | 0.2205  | 77.1           | 62.6           | 0.397        |
| CART **§ | 0.720 (0.699, 0.741) | 0.0994  | 79.6           | 56.1           | 0.357        |

\* means AUC is statistically different compared with NBC model.

† means AUC is statistically different compared with CART model.

‡ means AUC is statistically different compared with M1 model.

§ means AUC is statistically different compared with ANN model.

CART model had a lower AUC compared with M1 model ( $P < 0.001$ ), ANN model ( $P < 0.001$ ) and NBC model ( $P = 0.001$ ) for men. NBC model had a lower AUC compared with M1 model ( $P = 0.022$ ) and ANN model ( $P = 0.019$ ) for men.

**Supplementary Table S7** Discriminative ability, sensitivity and specificity of the different 6-year hypertension incident risk models for women in training set.

| Models   | AUC(95% CI)          | Cut-off | Sensitivity(%) | Specificity(%) | Youden index |
|----------|----------------------|---------|----------------|----------------|--------------|
| W1 *†    | 0.806 (0.791, 0.820) | 0.1920  | 74.3           | 73.7           | 0.480        |
| W2 *†    | 0.806 (0.791, 0.820) | 0.1922  | 74.0           | 74.2           | 0.482        |
| ANN *†   | 0.809 (0.795, 0.823) | 0.2512  | 74.0           | 75.8           | 0.498        |
| NBC †‡§  | 0.796 (0.780, 0.810) | 0.2588  | 74.8           | 72.7           | 0.475        |
| CART **§ | 0.740 (0.724, 0.756) | 0.0909  | 71.9           | 72.7           | 0.446        |

\* means AUC is statistically different compared with NBC model.

† means AUC is statistically different compared with CART model.

‡ means AUC is statistically different compared with W1 model.

§ means AUC is statistically different compared with W2 model.

|| means AUC is statistically different compared with ANN model.

CART model had a lower AUC compared with W1 model, W2 model, ANN model and NBC model for women ( $P < 0.001$ ). NBC model had a lower AUC compared with W1 model ( $P = 0.016$ ), W2 mode ( $P = 0.019$ ) and ANN model ( $P = 0.011$ ) for women.

**Supplementary Table S8** Calibration of Kaplan-Meier observed and predicted 6-year hypertension incident for men in training set.

| Groups            | Actual events* | Kaplan-Meier adjusted events† | Predicted events‡ | Calibration $\chi^2$ | P value  |
|-------------------|----------------|-------------------------------|-------------------|----------------------|----------|
| <b>M1 model</b>   |                |                               |                   |                      |          |
| 1                 | 7              | 8.133                         | 6.314             | 4.91334              | 0.84180  |
| 2                 | 8              | 8.672                         | 12.255            |                      |          |
| 3                 | 17             | 18.223                        | 17.177            |                      |          |
| 4                 | 16             | 17.731                        | 22.518            |                      |          |
| 5                 | 23             | 25.704                        | 28.929            |                      |          |
| 6                 | 34             | 36.341                        | 36.222            |                      |          |
| 7                 | 49             | 53.636                        | 46.110            |                      |          |
| 8                 | 56             | 59.259                        | 57.212            |                      |          |
| 9                 | 70             | 72.881                        | 73.651            |                      |          |
| 10                | 95             | 98.253                        | 98.331            |                      |          |
| <b>ANN model</b>  |                |                               |                   |                      |          |
| 1                 | 5              | 5.860                         | 9.041             | 24.54347             | 0.00352  |
| 2                 | 9              | 9.920                         | 15.833            |                      |          |
| 3                 | 19             | 21.160                        | 21.366            |                      |          |
| 4                 | 15             | 15.950                        | 27.595            |                      |          |
| 5                 | 26             | 28.350                        | 34.678            |                      |          |
| 6                 | 31             | 34.290                        | 43.003            |                      |          |
| 7                 | 46             | 49.270                        | 52.938            |                      |          |
| 8                 | 60             | 63.070                        | 63.796            |                      |          |
| 9                 | 59             | 61.650                        | 77.499            |                      |          |
| 10                | 105            | 107.480                       | 99.891            |                      |          |
| <b>NBC model</b>  |                |                               |                   |                      |          |
| 1                 | 7              | 8.083                         | 1.218             | 105.88180            | <0.00001 |
| 2                 | 13             | 14.756                        | 4.595             |                      |          |
| 3                 | 17             | 18.314                        | 9.667             |                      |          |
| 4                 | 21             | 23.774                        | 17.594            |                      |          |
| 5                 | 16             | 17.397                        | 29.081            |                      |          |
| 6                 | 35             | 37.417                        | 43.341            |                      |          |
| 7                 | 48             | 51.223                        | 62.927            |                      |          |
| 8                 | 59             | 63.547                        | 84.266            |                      |          |
| 9                 | 62             | 65.009                        | 107.362           |                      |          |
| 10                | 97             | 99.530                        | 135.796           |                      |          |
| <b>CART model</b> |                |                               |                   |                      |          |
| 1                 | 78             | 86.900                        | 88.000            | 4.56824              | 0.10186  |
| 2                 | 130            | 138.300                       | 154.000           |                      |          |
| 3                 | 167            | 174.300                       | 190.000           |                      |          |

\* Actual number of events through follow-up period.

† Observed number of events after Kaplan-Meier adjustment through follow-up period.

‡ Predicted number of events based on the different models through follow-up period.

**Supplementary Table S9** Calibration of Kaplan-Meier observed and predicted 6-year hypertension incident for women in training set.

| Groups            | Actual events <sup>*</sup> | Kaplan-Meier adjusted events <sup>†</sup> | Predicted events <sup>‡</sup> | Calibration $\chi^2$ | P value  |
|-------------------|----------------------------|-------------------------------------------|-------------------------------|----------------------|----------|
| <b>W1 model</b>   |                            |                                           |                               |                      |          |
| 1                 | 8                          | 8.535                                     | 12.980                        | 4.72712              | 0.31645  |
| 2                 | 38                         | 41.079                                    | 36.910                        |                      |          |
| 3                 | 58                         | 63.202                                    | 72.750                        |                      |          |
| 4                 | 135                        | 144.485                                   | 136.010                       |                      |          |
| 5                 | 249                        | 261.600                                   | 257.850                       |                      |          |
| <b>W2 model</b>   |                            |                                           |                               |                      |          |
| 1                 | 11                         | 12.050                                    | 12.830                        | 1.18206              | 0.88104  |
| 2                 | 33                         | 35.440                                    | 36.600                        |                      |          |
| 3                 | 62                         | 67.080                                    | 72.690                        |                      |          |
| 4                 | 134                        | 143.590                                   | 135.140                       |                      |          |
| 5                 | 248                        | 260.950                                   | 259.130                       |                      |          |
| <b>ANN model</b>  |                            |                                           |                               |                      |          |
| 1                 | 10                         | 10.750                                    | 15.200                        | 5.44370              | 0.24472  |
| 2                 | 30                         | 32.420                                    | 39.620                        |                      |          |
| 3                 | 65                         | 71.010                                    | 74.460                        |                      |          |
| 4                 | 133                        | 141.500                                   | 141.420                       |                      |          |
| 5                 | 250                        | 263.350                                   | 245.540                       |                      |          |
| <b>NBC model</b>  |                            |                                           |                               |                      |          |
| 1                 | 10                         | 10.780                                    | 3.479                         | 193.18980            | <0.00001 |
| 2                 | 34                         | 37.240                                    | 22.294                        |                      |          |
| 3                 | 59                         | 63.810                                    | 80.058                        |                      |          |
| 4                 | 147                        | 155.890                                   | 211.037                       |                      |          |
| 5                 | 238                        | 251.680                                   | 407.628                       |                      |          |
| <b>CART model</b> |                            |                                           |                               |                      |          |
| 1                 | 129                        | 140.300                                   | 170.000                       | 17.95192             | 0.00012  |
| 2                 | 199                        | 209.300                                   | 240.000                       |                      |          |
| 3                 | 160                        | 169.600                                   | 194.000                       |                      |          |

\* Actual number of events through follow-up period.

† Observed number of events after Kaplan-Meier adjustment through follow-up period.

‡ Predicted number of events based on the different models through follow-up period.

**Supplementary Table S10** Discriminative ability, sensitivity and specificity of the different 6-year hypertension incident risk models for men in testing set.

| Models   | AUC(95% CI)          | Cut-off | Sensitivity(%) | Specificity(%) | Youden index |
|----------|----------------------|---------|----------------|----------------|--------------|
| M1 *     | 0.771 (0.750, 0.791) | 0.1745  | 83.3           | 59.7           | 0.430        |
| ANN *    | 0.773 (0.752, 0.793) | 0.2799  | 68.2           | 74.0           | 0.422        |
| NBC *    | 0.760 (0.738, 0.781) | 0.2205  | 78.2           | 62.5           | 0.407        |
| CART †‡§ | 0.722 (0.699, 0.743) | 0.0994  | 80.1           | 55.5           | 0.356        |

\* means AUC is statistically different compared with CART model.

† means AUC is statistically different compared with M1 model.

‡ means AUC is statistically different compared with ANN model.

§ means AUC is statistically different compared with NBC model.

CART model had a lower AUC compared with M1 model, ANN model and NBC model for men ( $P < 0.001$ ).

**Supplementary Table S11** Discriminative ability, sensitivity and specificity of the different 6-year hypertension incident risk models for women in testing set.

| Models   | AUC(95% CI)          | Cut-off | Sensitivity(%) | Specificity(%) | Youden index |
|----------|----------------------|---------|----------------|----------------|--------------|
| W1 *     | 0.765 (0.746, 0.783) | 0.1798  | 71.5           | 69.5           | 0.410        |
| W2 *     | 0.764 (0.746, 0.783) | 0.1446  | 79.6           | 61.6           | 0.412        |
| ANN *    | 0.756 (0.737, 0.775) | 0.2022  | 75.8           | 64.5           | 0.403        |
| NBC *    | 0.761 (0.742, 0.779) | 0.1860  | 78.3           | 63.1           | 0.414        |
| CART †‡§ | 0.698 (0.677, 0.717) | 0.0909  | 67.4           | 68.6           | 0.360        |

\* means AUC is statistically different compared with CART model.

† means AUC is statistically different compared with W1 model.

‡ means AUC is statistically different compared with W2 model.

§ means AUC is statistically different compared with ANN model.

|| means AUC is statistically different compared with NBC model.

CART model had a lower AUC compared with W1 model, W2 model, ANN model and NBC model for women ( $P < 0.001$ ).

**Supplementary Table S12** Calibration of Kaplan-Meier observed and predicted 6-year hypertension incident for men in testing set.

| Groups            | Actual events* | Kaplan-Meier adjusted events† | Predicted events‡ | Calibration $\chi^2$ | P value  |
|-------------------|----------------|-------------------------------|-------------------|----------------------|----------|
| <b>M1 model</b>   |                |                               |                   |                      |          |
| 1                 | 6              | 7.145                         | 5.465             | 6.30570              | 0.70898  |
| 2                 | 6              | 6.612                         | 10.669            |                      |          |
| 3                 | 12             | 12.800                        | 14.919            |                      |          |
| 4                 | 13             | 14.145                        | 19.585            |                      |          |
| 5                 | 22             | 24.732                        | 25.246            |                      |          |
| 6                 | 30             | 32.536                        | 31.939            |                      |          |
| 7                 | 40             | 43.314                        | 40.553            |                      |          |
| 8                 | 53             | 55.694                        | 50.087            |                      |          |
| 9                 | 62             | 64.824                        | 64.789            |                      |          |
| 10                | 80             | 82.800                        | 85.824            |                      |          |
| <b>ANN model</b>  |                |                               |                   |                      |          |
| 1                 | 5              | 5.810                         | 7.800             | 29.27430             | 0.00058  |
| 2                 | 7              | 7.885                         | 13.810            |                      |          |
| 3                 | 14             | 15.496                        | 18.640            |                      |          |
| 4                 | 11             | 11.615                        | 24.190            |                      |          |
| 5                 | 25             | 27.557                        | 30.210            |                      |          |
| 6                 | 26             | 29.310                        | 37.800            |                      |          |
| 7                 | 40             | 42.909                        | 46.440            |                      |          |
| 8                 | 52             | 54.473                        | 55.670            |                      |          |
| 9                 | 51             | 53.556                        | 67.990            |                      |          |
| 10                | 93             | 94.976                        | 86.770            |                      |          |
| <b>NBC model</b>  |                |                               |                   |                      |          |
| 1                 | 5              | 6.031                         | 1.021             | 82.26996             | <0.00001 |
| 2                 | 11             | 12.667                        | 4.025             |                      |          |
| 3                 | 11             | 11.923                        | 8.625             |                      |          |
| 4                 | 16             | 18.267                        | 15.609            |                      |          |
| 5                 | 18             | 19.974                        | 25.613            |                      |          |
| 6                 | 30             | 31.739                        | 38.432            |                      |          |
| 7                 | 40             | 42.337                        | 55.350            |                      |          |
| 8                 | 54             | 57.485                        | 73.817            |                      |          |
| 9                 | 54             | 56.913                        | 94.303            |                      |          |
| 10                | 85             | 87.500                        | 118.341           |                      |          |
| <b>CART model</b> |                |                               |                   |                      |          |
| 1                 | 65             | 72.890                        | 75.870            | 5.249259             | 0.07247  |
| 2                 | 112            | 118.570                       | 134.950           |                      |          |
| 3                 | 147            | 154.000                       | 168.830           |                      |          |

\* Actual number of events through follow-up period.

† Observed number of events after Kaplan-Meier adjustment through follow-up period.

‡ Predicted number of events based on the different models through follow-up period.

**Supplementary Table S13** Calibration of Kaplan-Meier observed and predicted 6-year hypertension incident for women in testing set.

| Groups            | Actual events* | Kaplan-Meier adjusted events† | Predicted events‡ | Calibration $\chi^2$ | P value  |
|-------------------|----------------|-------------------------------|-------------------|----------------------|----------|
| <b>W1 model</b>   |                |                               |                   |                      |          |
| 1                 | 13             | 14.02                         | 10.78             | 6.78323              | 0.14780  |
| 2                 | 28             | 29.97                         | 29.14             |                      |          |
| 3                 | 60             | 66.56                         | 55.69             |                      |          |
| 4                 | 109            | 115.22                        | 100.41            |                      |          |
| 5                 | 172            | 179.74                        | 193.56            |                      |          |
| <b>W2 model</b>   |                |                               |                   |                      |          |
| 1                 | 13             | 13.790                        | 10.630            | 7.40462              | 0.11599  |
| 2                 | 27             | 29.280                        | 28.830            |                      |          |
| 3                 | 65             | 71.020                        | 55.690            |                      |          |
| 4                 | 104            | 110.420                       | 100.370           |                      |          |
| 5                 | 173            | 180.330                       | 195.010           |                      |          |
| <b>ANN model</b>  |                |                               |                   |                      |          |
| 1                 | 15             | 15.950                        | 12.520            | 4.74466              | 0.31451  |
| 2                 | 29             | 31.730                        | 31.700            |                      |          |
| 3                 | 66             | 72.070                        | 57.660            |                      |          |
| 4                 | 103            | 110.170                       | 103.690           |                      |          |
| 5                 | 169            | 175.630                       | 182.410           |                      |          |
| <b>NBC model</b>  |                |                               |                   |                      |          |
| 1                 | 17             | 18.450                        | 3.347             | 189.75400            | <0.00001 |
| 2                 | 23             | 25.680                        | 20.721            |                      |          |
| 3                 | 64             | 67.970                        | 64.790            |                      |          |
| 4                 | 118            | 126.840                       | 158.387           |                      |          |
| 5                 | 160            | 166.540                       | 299.485           |                      |          |
| <b>CART model</b> |                |                               |                   |                      |          |
| 1                 | 121            | 129.900                       | 115.000           | 19.73303             | 0.00005  |
| 2                 | 138            | 146.300                       | 172.400           |                      |          |
| 3                 | 123            | 129.600                       | 160.700           |                      |          |

\* Actual number of events through follow-up period.

† Observed number of events after Kaplan-Meier adjustment through follow-up period.

‡ Predicted number of events based on the different models through follow-up period.

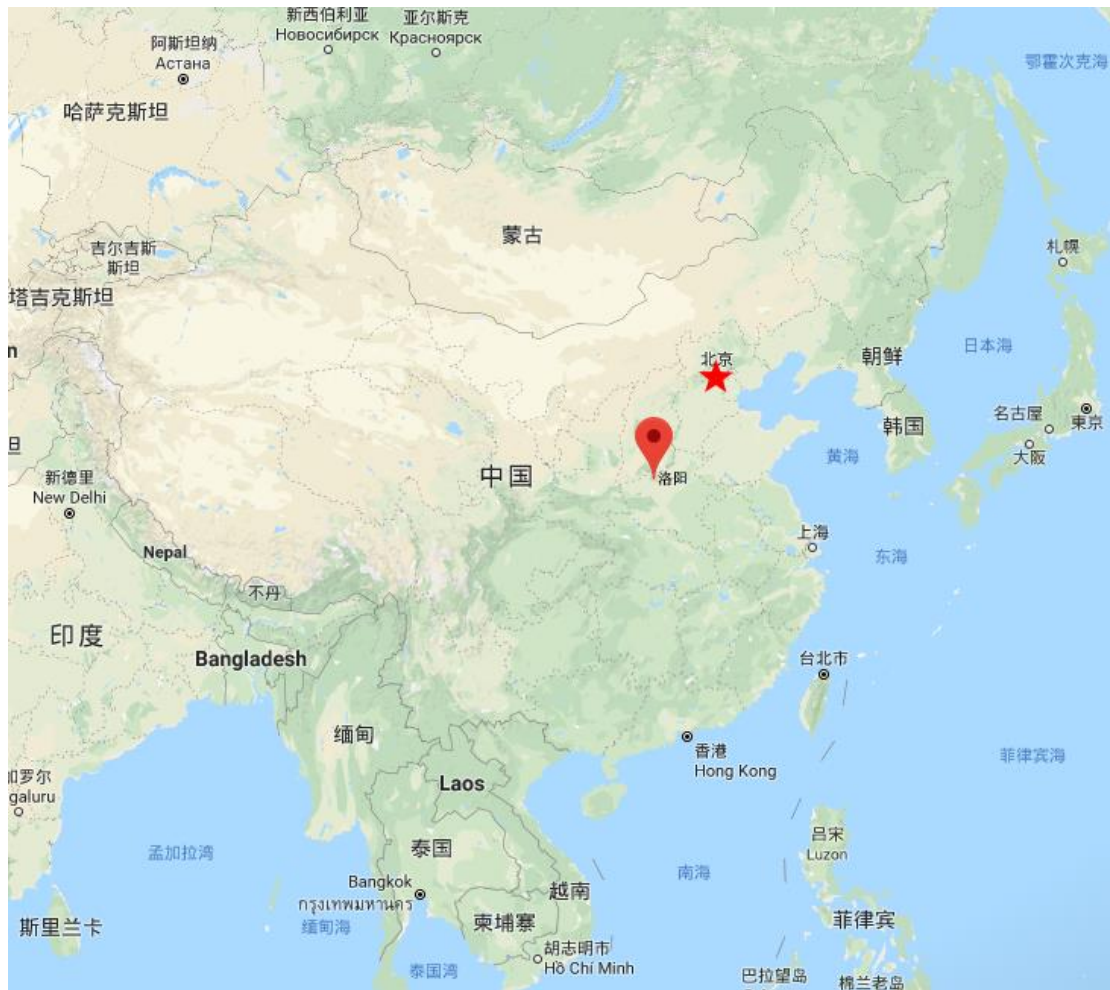

**Supplementary Figure S1** Sketch map of data collection site. Red star shows the position of Beijing (capital of China) and the red location point shows the data collection site (Luoyang City).

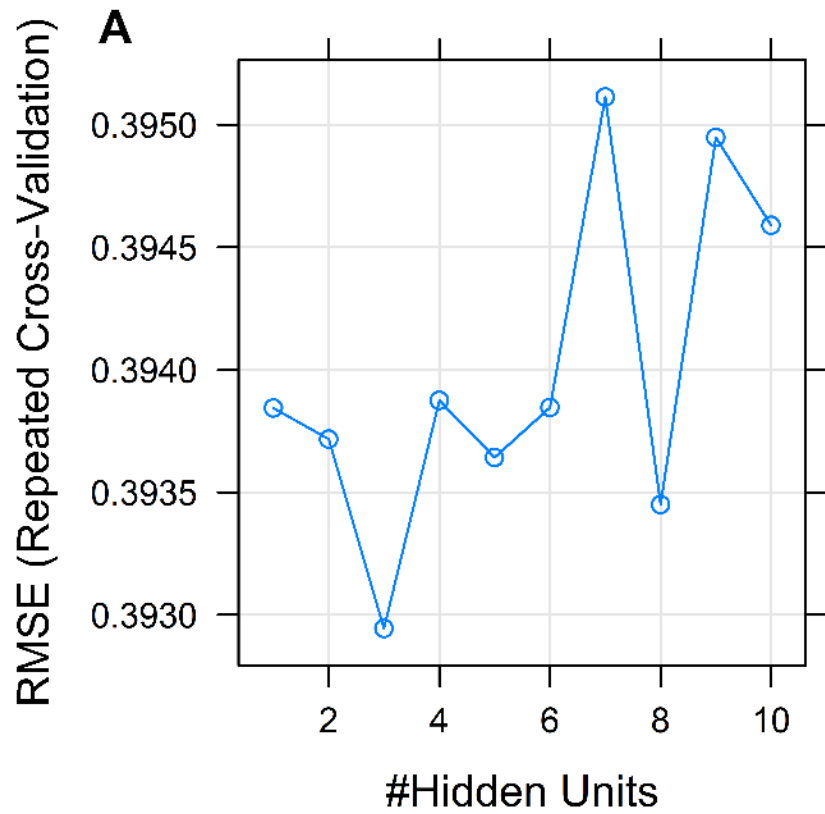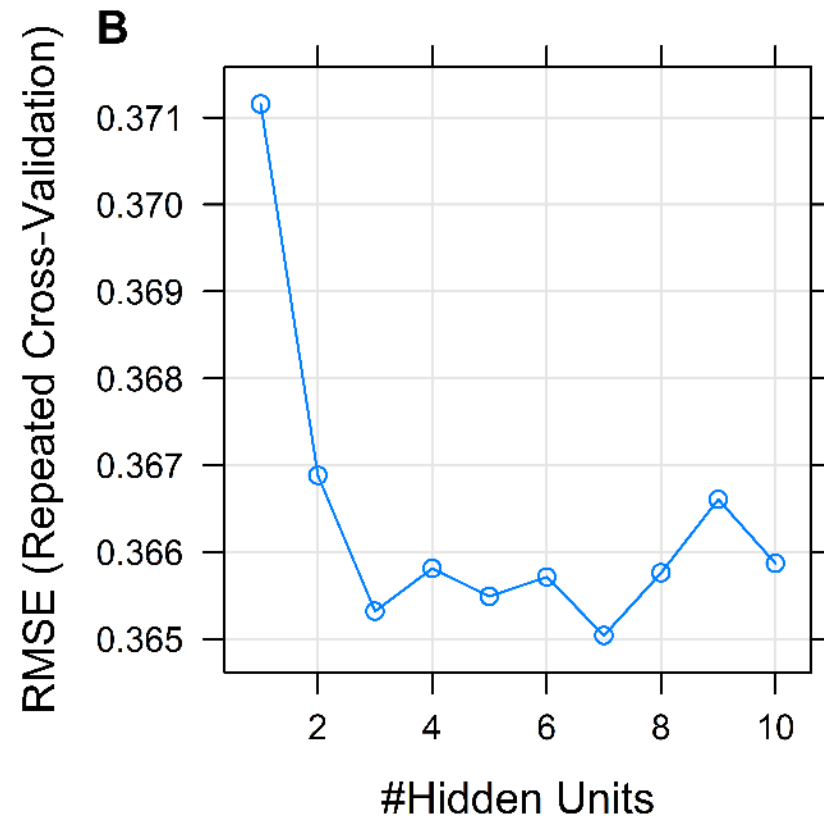

**Supplementary Figure S2** Nodes in hidden layer for men (A) and women (B) in ANN models according to 10-fold cross-validation.



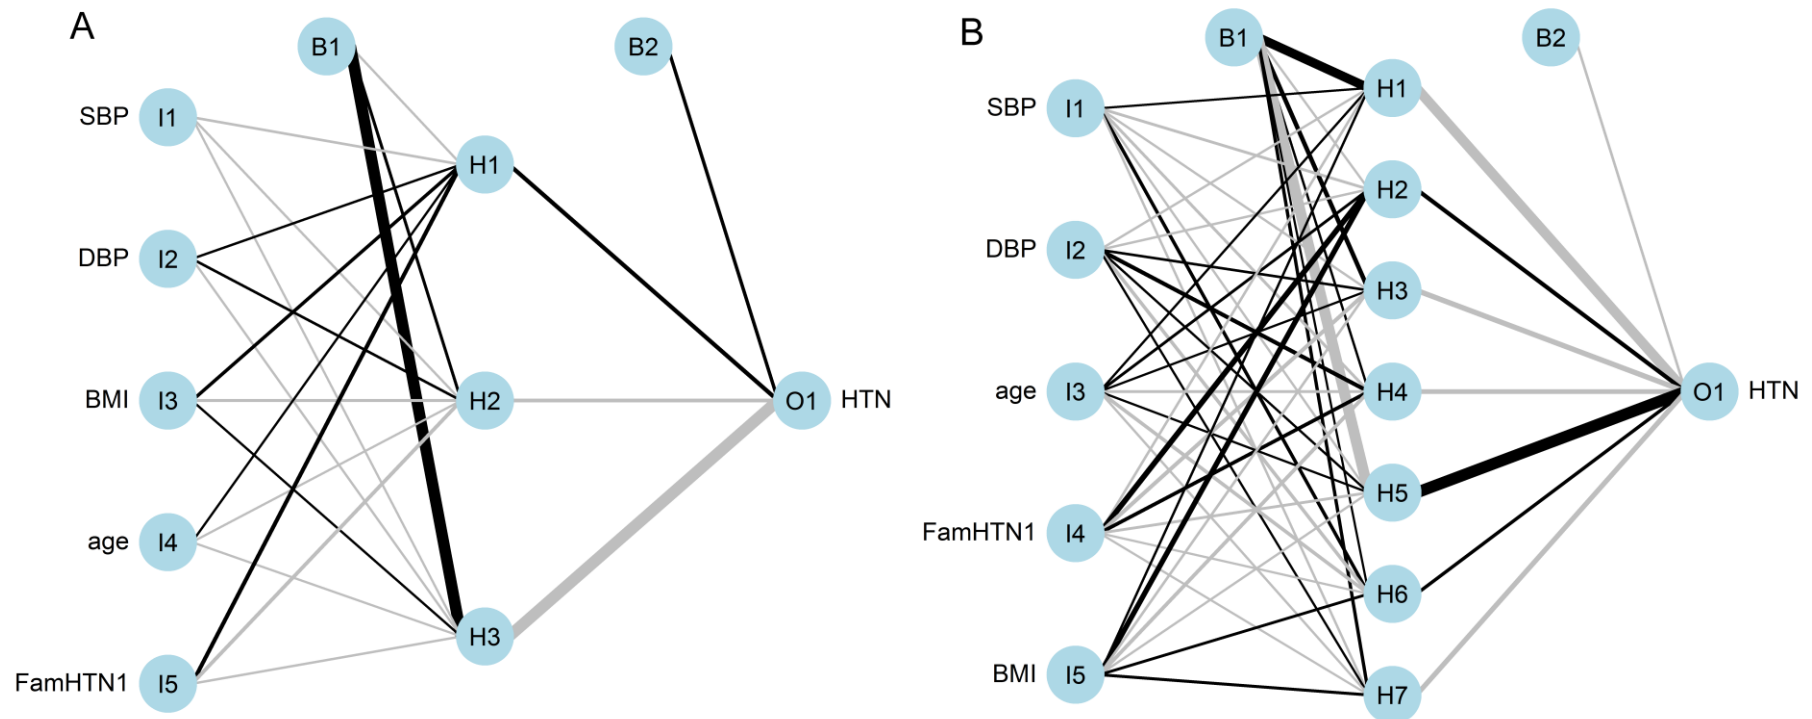

**Supplementary Figure S3** Network chat of ANN models. There are three nodes in hidden layer for men (A) and nine nodes in hidden layer for women (B), and line thickness and color gradation represent the weight of the predictors. FamHTN1 means hypertension parental history and HTN means hypertension.

**A**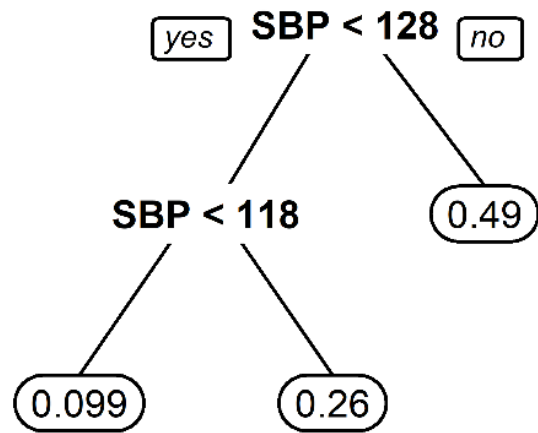**B**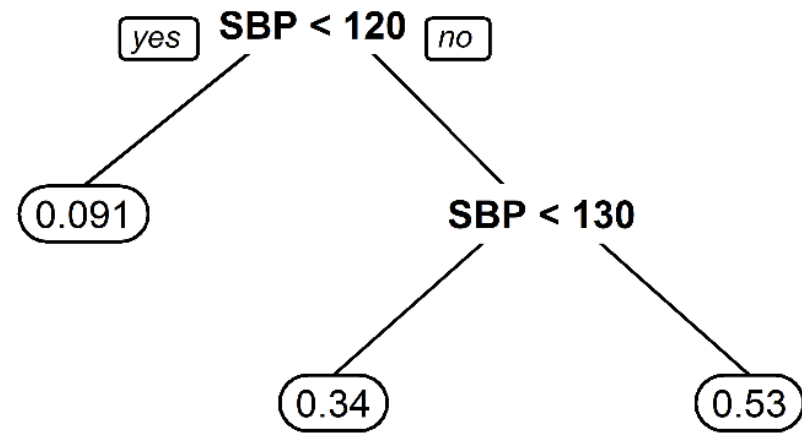

**Supplementary Figure S4** Tree graph of CART models for men (A) and women (B).

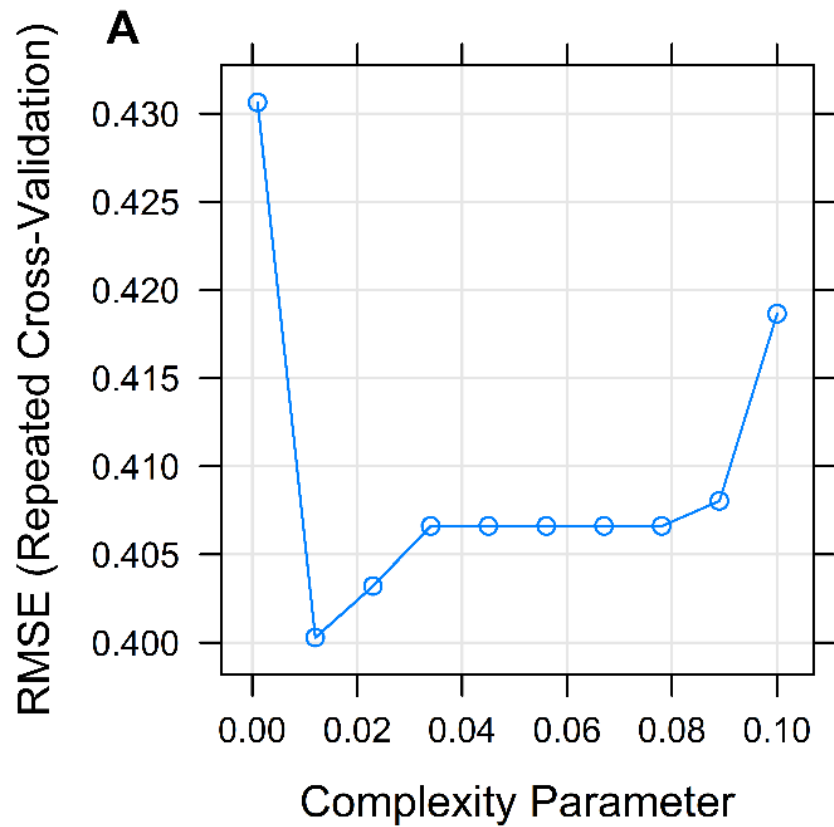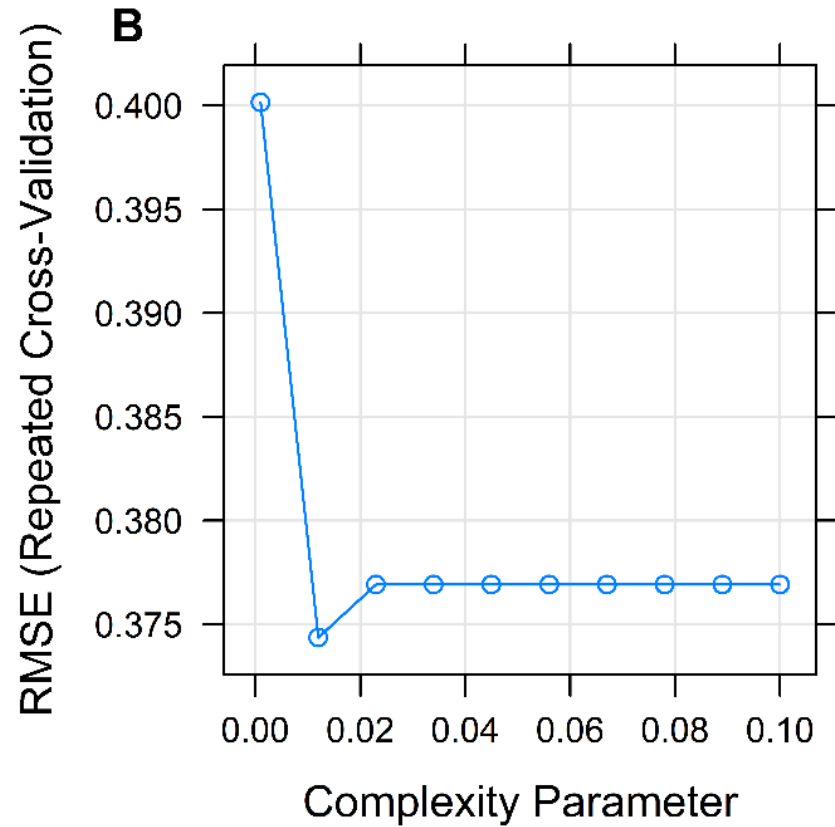

**Supplementary Figure S5** Complexity parameter for men (A) and women (B) in CART models according to 10-fold cross-validation.

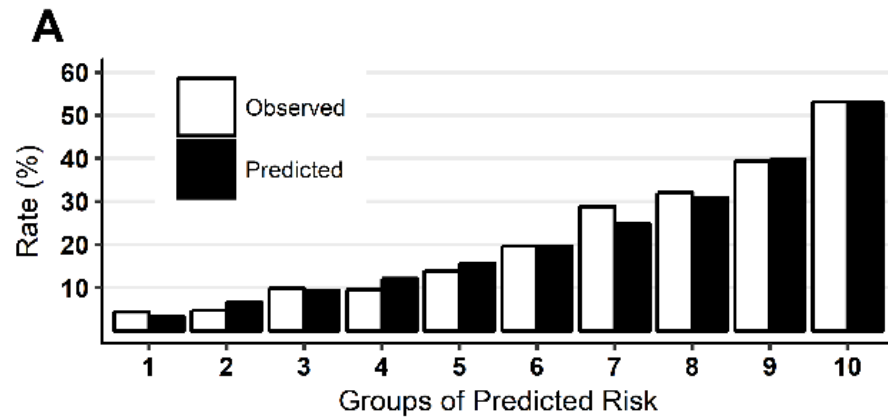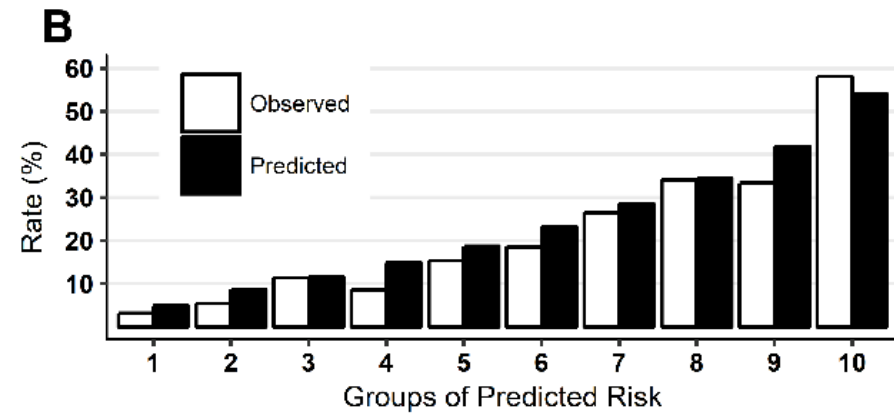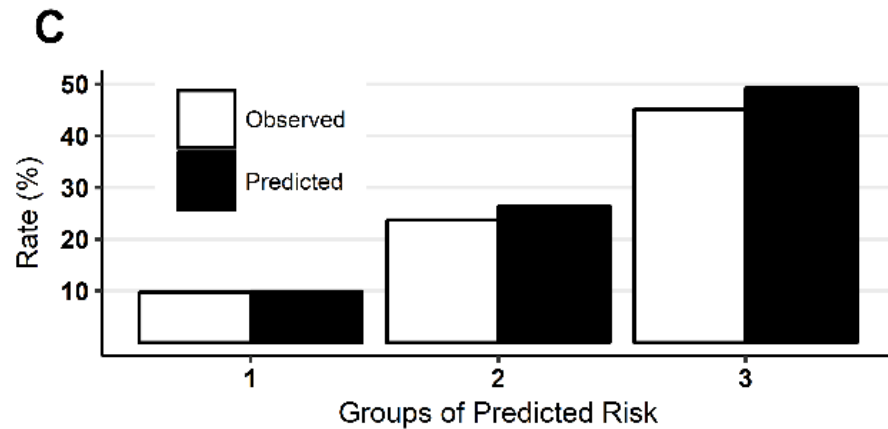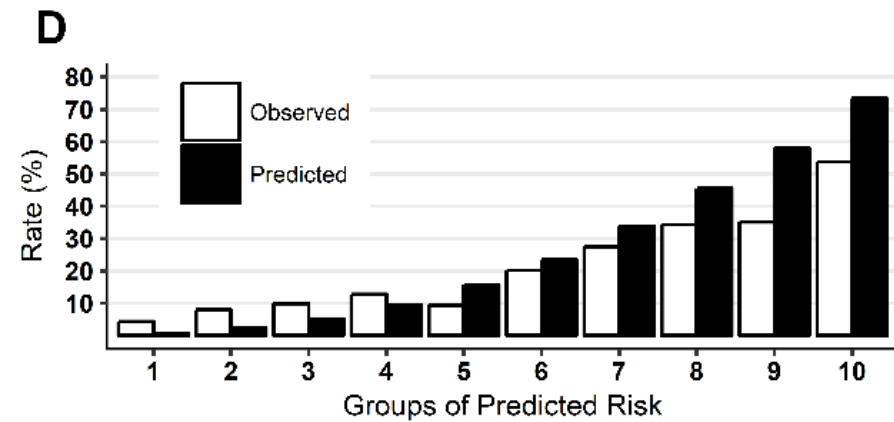

**Supplementary Figure S6** Kaplan-Meier observed and predicted hypertension incident for different hypertension models in training set men: M1 model (A), ANN model (B), CART model (C) and NBC model (D), by groups of predicted probabilities.

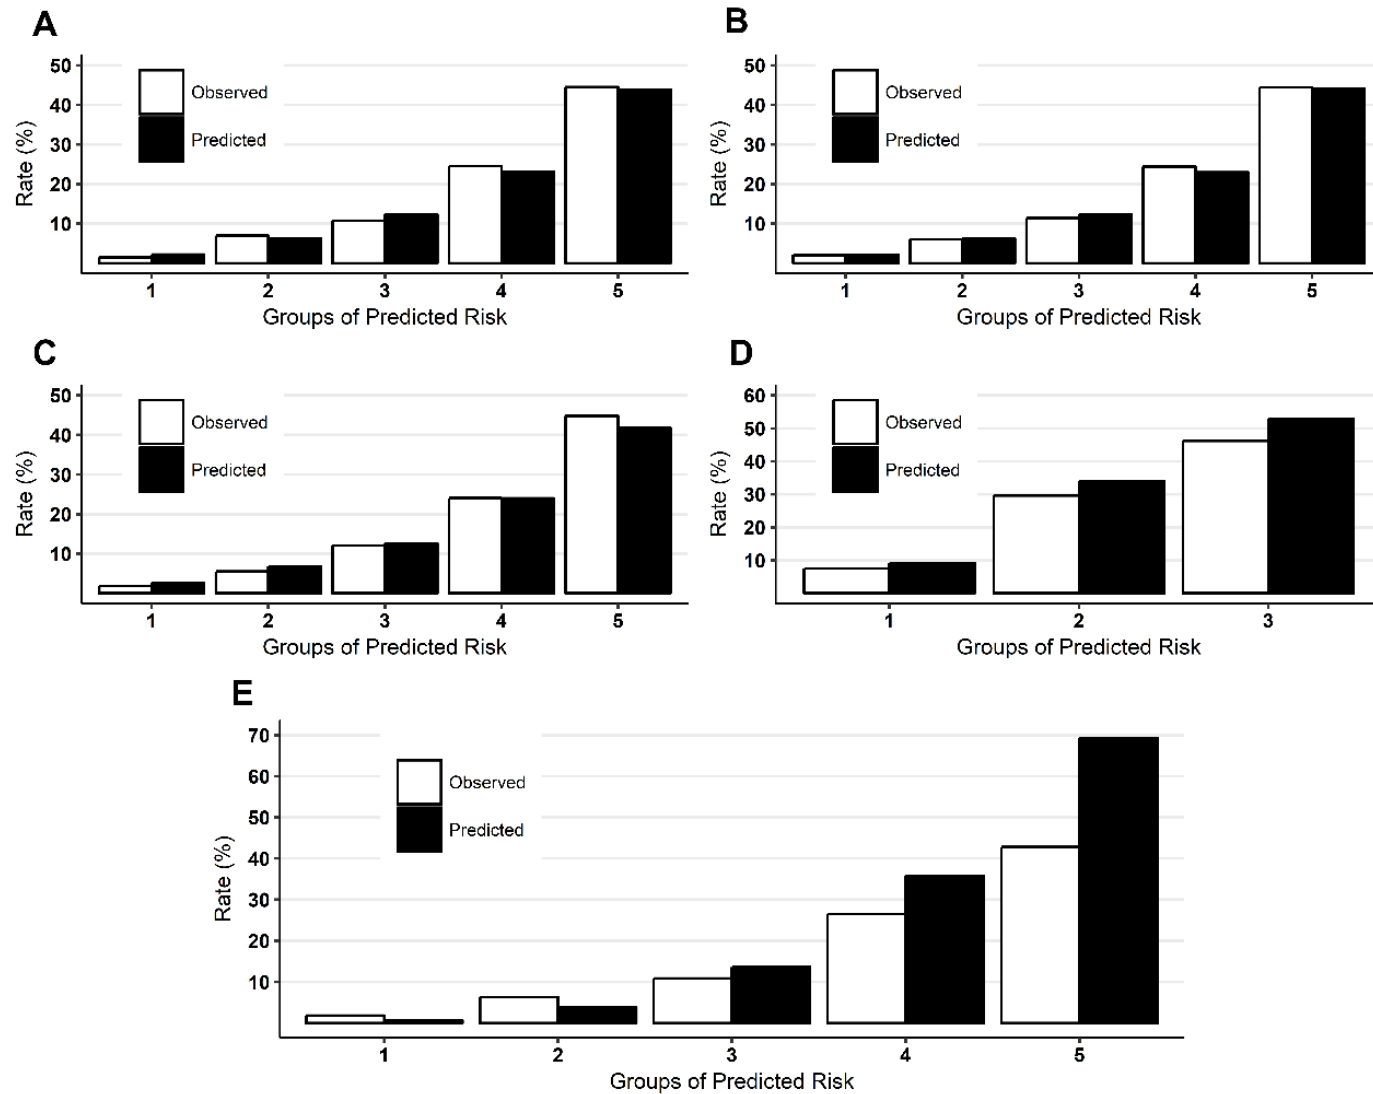

**Supplementary Figure S7** Kaplan-Meier observed and predicted hypertension incident for different hypertension models in training set women: W1 model (A), W2 model (B), ANN model (C), CART model (D) and NBC model (E), by groups of predicted probabilities.

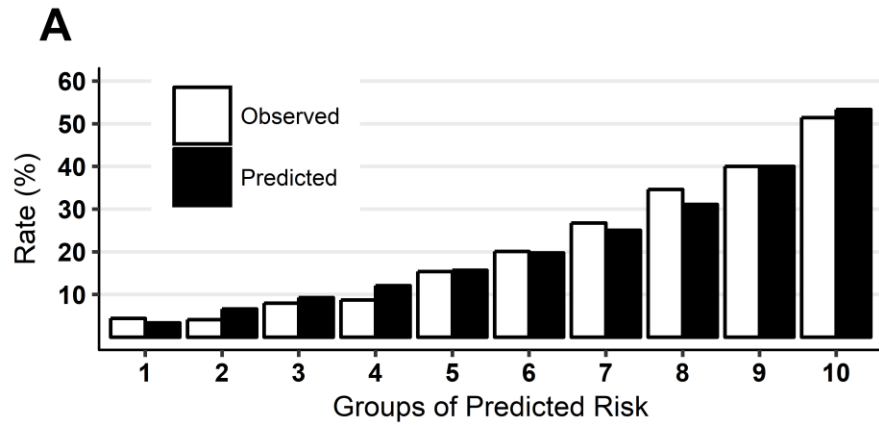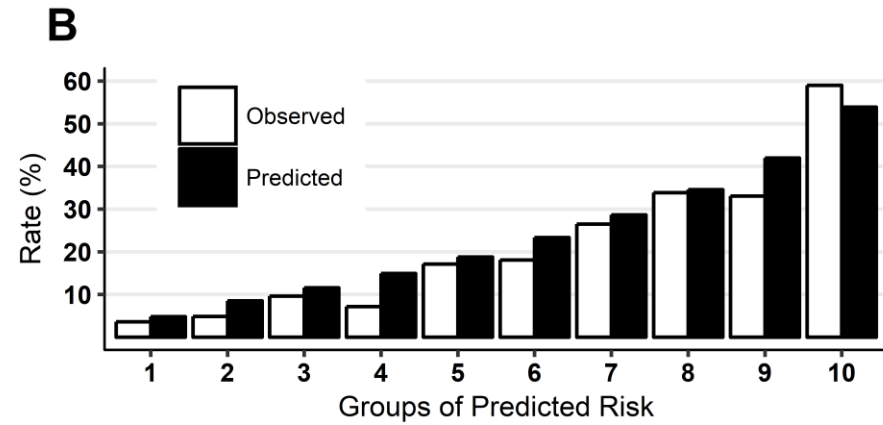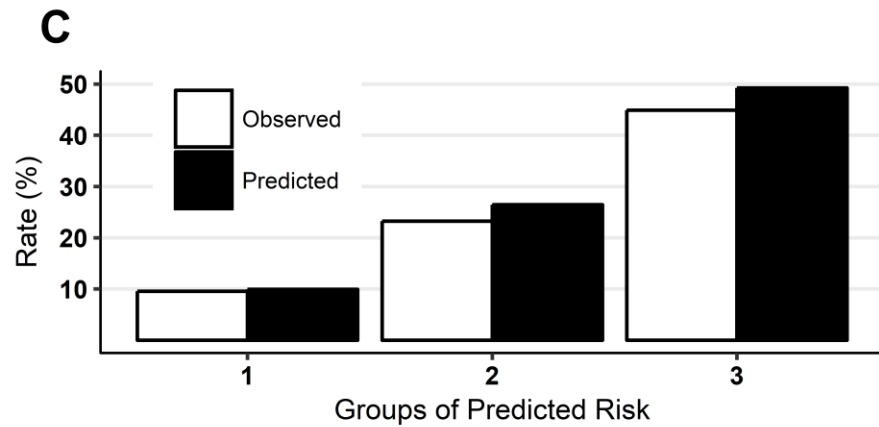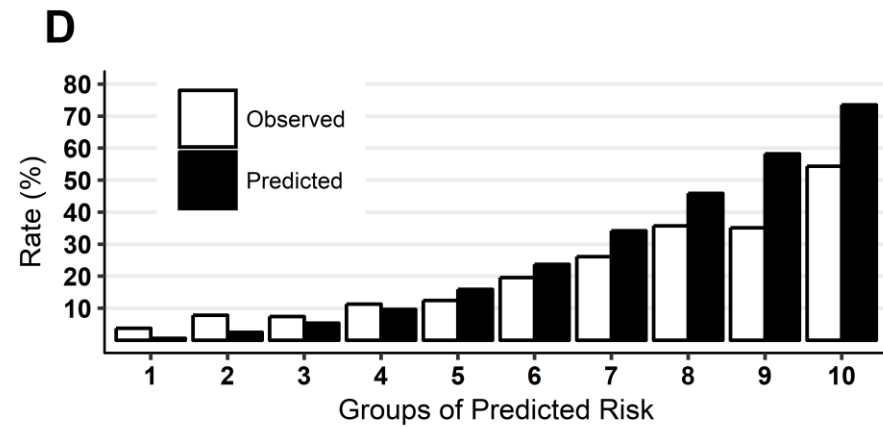

**Supplementary Figure S8** Kaplan-Meier observed and predicted hypertension incident for different hypertension models in testing set men: M1 model (A), ANN model (B), CART model (C) and NBC model (D), by groups of predicted probabilities.

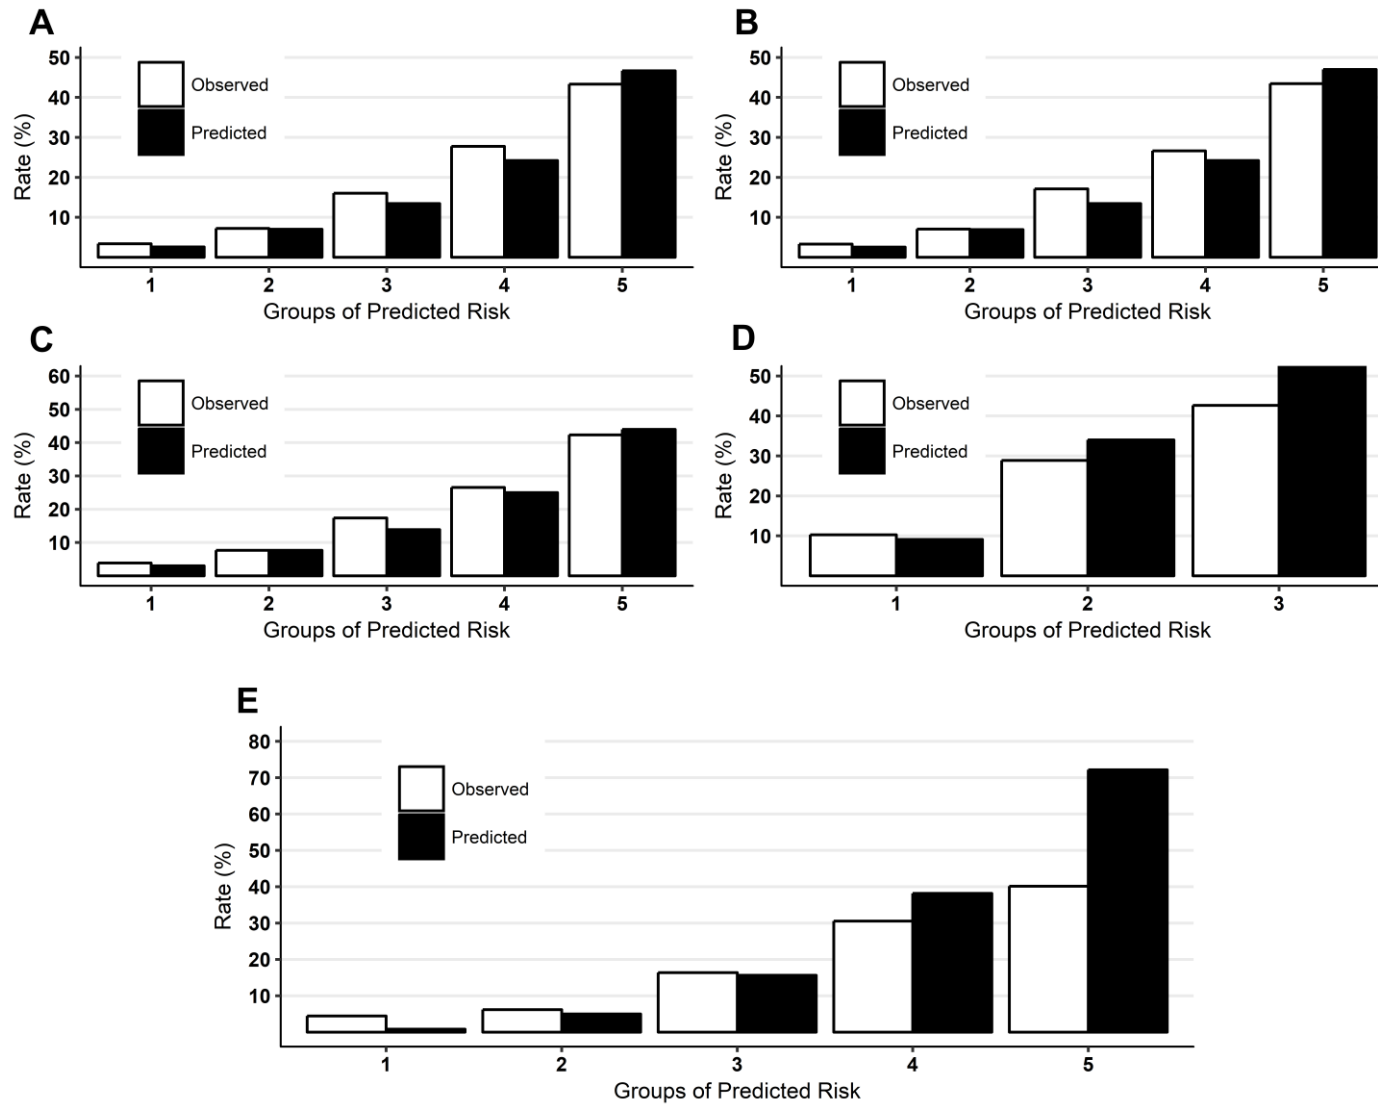

**Supplementary Figure S9** Kaplan-Meier observed and predicted hypertension incident for different hypertension models in testing set women: W1 model (A), W2 model (B), ANN model (C), CART model (D) and NBC model (E), by groups of predicted probabilities.
